# Supplementary material for: Racial/Ethnic Disparities in US Adolescents’ Dietary Quality and Its Modification by Weight-Related Factors and Physical Activity
Source: MDPI journal article supplement (doi:10.3390/ijerph16234803), 2019-11-29
Supplement: s1 [file s1]

**Supplementary Table S1.** Respondents characteristics by sex (n = 3373).

|                                        | Male            | Female          | <i>p</i> -Value |
|----------------------------------------|-----------------|-----------------|-----------------|
|                                        | n = 1711(50.5%) | n = 1662(49.5%) |                 |
| Age (yrs)                              | 15.4 ± 0.1      | 15.4 ± 0.1      | 0.933           |
| Race/ethnicity                         |                 |                 |                 |
| Hispanic                               | 576 (63.5)      | 506 (62.4)      | 0.476           |
| Non-Hispanic White                     | 483 (15.0)      | 485 (15.8)      | 0.420           |
| Non-Hispanic Black                     | 652 (21.6)      | 671 (21.8)      | 0.843           |
| Parent education level, n (weighted %) |                 |                 |                 |
| High school or less                    | 850 (39.9)      | 856 (42.9)      | 0.158           |
| College or above                       | 800 (60.1)      | 754 (57.1)      | 0.158           |
| PIR, n (weighted %)                    |                 |                 |                 |
| <1.0                                   | 482 (20.3)      | 528 (23.4)      | 0.108           |
| ≥ 1.0                                  | 1112 (79.7)     | 995 (76.6)      | 0.108           |
| Body mass index (kg/m2)                | 24.1 ± 0.2      | 24.3 ± 0.2      | 0.455           |
| Actual weight status, n (weighted %)   |                 |                 |                 |
| Normal weight                          | 1021 (61.1)     | 954 (63.1)      | 0.648           |
| Overweight                             | 290 (17.0)      | 323 (17.0)      | 0.875           |
| Obese                                  | 400 (21.8)      | 385 (20.0)      | 0.378           |
| Weight loss attempt, n (weighted%)     | 647 (35.6)      | 857 (47.8)      | <0.001*         |
| Weight dissatisfied, n (weighted %)    | 926 (50.7)      | 946 (52.0)      | 0.259           |
| Met PA recommendation, n (weighted %)  | 1112 (68.9)     | 746 (50.9)      | <0.001*         |
| HEI-2015 (100)                         | 46.3±0.4        | 48.0±0.3        | 0.001*          |
| Adequacy                               |                 |                 |                 |
| Total Fruits (5)                       | 2.1 ± 0.1       | 2.3 ± 0.1       | 0.006*          |
| Whole Fruits (5)                       | 1.9 ± 0.1       | 2.2 ± 0.1       | 0.007*          |
| Total Vegetables (5)                   | 2.2 ± 0.0       | 2.6 ± 0.0       | <0.001*         |
| Greens and Beans (5)                   | 1.0 ± 0.1       | 1.3 ± 0.1       | <0.001*         |
| Whole Grains (10)                      | 2.3 ± 0.1       | 2.4 ± 0.1       | 0.481           |
| Dairy (10)                             | 7.0 ± 0.1       | 6.6 ± 0.1       | 0.002*          |
| Total protein foods (5)                | 4.2 ± 0.0       | 4.0 ± 0.0       | <0.001*         |
| Seafood and Plant Proteins (5)         | 1.8 ± 0.1       | 2.0 ± 0.1       | 0.043*          |
| Fatty Acids (10)                       | 3.8 ± 0.1       | 4.4 ± 0.1       | <0.001*         |
| Moderation                             |                 |                 |                 |
| Refined Grains (10)                    | 4.8 ± 0.1       | 4.9 ± 0.1       | 0.916           |
| Sodium (10)                            | 4.1 ± 0.1       | 4.1 ± 0.1       | 0.791           |
| Added Sugars (10)                      | 5.3 ± 0.1       | 5.4 ± 0.1       | 0.308           |
| Saturated Fats (10)                    | 5.7 ± 0.1       | 5.9 ± 0.1       | 0.072           |

Note: Data are present as weighted Mean± standard error for continuous variables and frequencies and weighted proportions for categorical variables; *p*-value for continuous variables was obtained by performing PROC SURVEYREG, and *p*-value for category variable was obtained by performing PROC SURVEYLOGISTIC; except for sex, age, parental education level and family income comparisons which were not performed adjusted analysis, all the other variable comparisons were adjusted for age, race/ethnicity, parental education level and PIR; PA, physical activity; PIR, the ratio of family income to poverty; HEI, the Healthy Eating Index; \**p* < 0.05.
